# Supplementary material
Source: Springer Nature journal article supplement (https://www.springerprofessional.de/resource/supplementary/13638_2014_1062_MOESM10_ESM.pdf/11898932)

**(a)** Link Failure Rate: 5%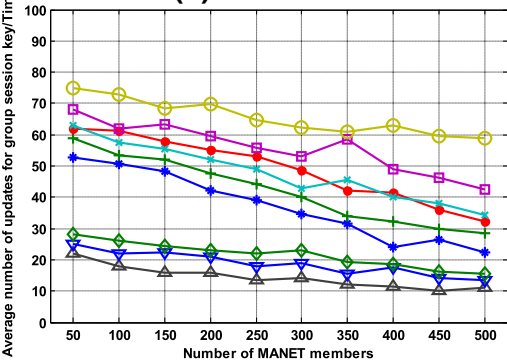**(b)** Link Failure Rate: 10%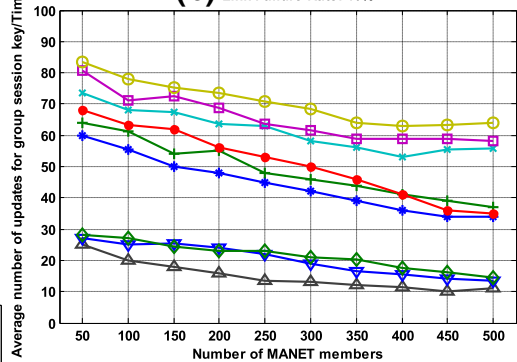**(c)** Link Failure Rate: 15%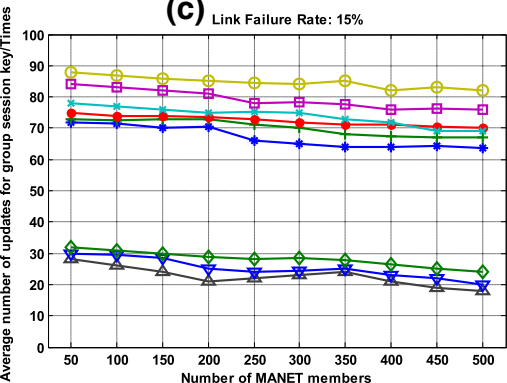**(d)** Link Failure Rate: 20%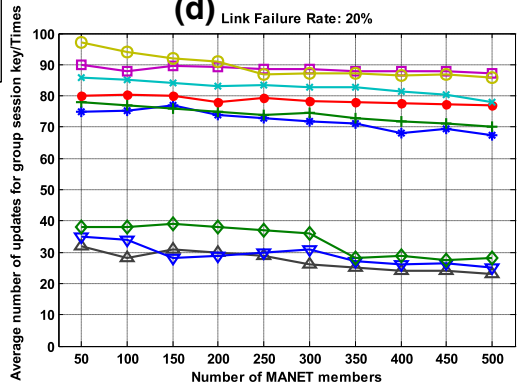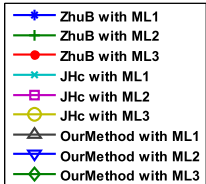

Supplement: MOESM10 [file 11898932]
